# Supplementary material for: Uncertainty, Complexity and Constraints: How Do We Robustly Assess Biological Responses under a Rapidly Changing Climate?
Source: MDPI journal article supplement (doi:10.3390/cli9120177), 2021-12-07
Supplement: s1 [file s1]

# Table S2. Climate Scenarios by 2050 for the White-tailed Ptarmigan Range in Northern Colorado

The summary table below describes changes in the future climate by 2050 (2040-2069) relative to the 1971-2000 period under three climate scenarios: **Very Hot and Dry** (IPSL-CM5A-MR.rcp85), **Hot** (CCSM4.rcp45), and **Hot and Very Wet** (MIROC5.rcp45)

| Climate Metric                   | Time Period | Very Hot and Dry | Hot | Hot and Very Wet | Historical Value |
|----------------------------------|-------------|------------------|-----|------------------|------------------|
| Mean Temperature (°F)            | Annual      | 8                | 4   | 6                | 30 °F            |
|                                  | Winter      | 6                | 3   | 4                | 14 °F            |
|                                  | Spring      | 6                | 3   | 8                | 28 °F            |
|                                  | Summer      | 8                | 4   | 3                | 49 °F            |
|                                  | Fall        | 8                | 5   | 5                | 31 °F            |
| Precipitation (%)                | Annual      | -8               | 6   | 6                | 31 inches        |
|                                  | Winter      | 6                | 16  | 4                | 8 inches         |
|                                  | Spring      | -16              | 11  | 12               | 10 inches        |
|                                  | Summer      | -16              | 3   | 16               | 7 inches         |
|                                  | Fall        | 2                | 3   | 0                | 6 inches         |
| Daytime Maximum Temperature (°F) | Annual      | 7                | 4   | 5                | 42 °F            |
|                                  | Winter      | 6                | 3   | 4                | 25 °F            |
|                                  | Spring      | 7                | 4   | 8                | 40 °F            |
|                                  | Summer      | 8                | 5   | 3                | 60 °F            |
|                                  | Fall        | 8                | 5   | 5                | 42 °F            |
| Daytime Minimum Temperature (°F) | Annual      | 7                | 4   | 5                | 19 °F            |
|                                  | Winter      | 7                | 4   | 5                | 3 °F             |
|                                  | Spring      | 6                | 3   | 7                | 16 °F            |
|                                  | Summer      | 8                | 4   | 4                | 37 °F            |
|                                  | Fall        | 7                | 4   | 4                | 21 °F            |
| Snow Water Equivalent (%)        | January 1   | -19              | 6   | -19              | 5 inches         |
|                                  | April 1     | -9               | 3   | -2               | 12 inches        |
|                                  | May 1       | -27              | 1   | -29              | 15 inches        |
| Soil Moisture (%)                | Spring      | 0                | -2  | 15               | 10 inches        |
|                                  | Summer      | -25              | -3  | -16              | 16 inches        |
|                                  | Fall        | -27              | -14 | -14              | 11 inches        |
| Potential Evapotranspiration (%) | Summer      | 22               | 11  | 10               | 15 inches        |
|                                  | Fall        | 61               | 34  | 39               | 4 inches         |

| Climate Metric                                                            | Very Hot and Dry | Hot             | Hot and Very Wet | Historical Value |
|---------------------------------------------------------------------------|------------------|-----------------|------------------|------------------|
| Coldest Winter Day (°F)<br>(warmer relative to historical by °F)          | -12<br>(7)       | -16<br>(3)      | -14<br>(5)       | -19              |
| Hottest Summer Day (°F)<br>(warmer relative to historical by °F)          | 77<br>(8)        | 74<br>(5)       | 73<br>(4)        | 69               |
| #Days with daytime low above 32°F<br>(increases in #days)                 | 143<br>(44)      | 123<br>(24)     | 135<br>(36)      | 99               |
| First Fall Freeze<br>(later relative to historical by #days)              | Sep 21<br>(49)   | Sep 16<br>(44)  | Sep 10<br>(38)   | Aug 3            |
| Last Spring Freeze<br>(earlier relative to historical by #days)           | May 31<br>(19)   | Jun 14<br>(5)   | Jun 14<br>(5)    | Jun 19           |
| Growing Season Length (#days)<br>(higher relative to historical by #days) | 113<br>(68)      | 94<br>(49)      | 88<br>(43)       | 45               |
| Growing Degree Days (°F; 32°F base)                                       | 3575             | 2864            | 3083             | 2127             |
| Frequency of Severe Drought like 2002                                     | Every other year | Every 2-3 years | Every 3 years    | -                |
| Duration of Severe Drought like 2002                                      | 1-5 years        | 1-4 years       | 1-2 years        | 1 year           |
| "High" Fire Danger Days<br>(higher relative to historical by #days)       | 115<br>(42)      | 83<br>(10)      | 81<br>(8)        | 73               |
| "Very High" Fire Danger Days<br>(higher relative to historical by #days)  | 70<br>(33)       | 45<br>(8)       | 43<br>(6)        | 37               |
| "Extreme" Fire Danger Days<br>(higher relative to historical by #days)    | 34<br>(23)       | 17<br>(6)       | 11<br>(0)        | 11               |

|                         |                                                                                                                                                                                                                                                                                                                                                                                                                                                                                                                                                                                                                                       |
|-------------------------|---------------------------------------------------------------------------------------------------------------------------------------------------------------------------------------------------------------------------------------------------------------------------------------------------------------------------------------------------------------------------------------------------------------------------------------------------------------------------------------------------------------------------------------------------------------------------------------------------------------------------------------|
| <b>Very Hot and Dry</b> | <ul style="list-style-type: none"> <li>• Very large increase in summer and fall temperatures (8°F) with substantial reduction in spring (-15%) and summer (-15%) precipitation</li> <li>• Hottest summer daytime high increases by 8°F; severe drought every other year with extreme drought conditions lasting up to 5 years</li> <li>• Large reduction in spring snowpack (May 1 SWE is 25% lower)</li> <li>• Growing season increases by more than 2 months; "High" fire danger days increase by ~40 days</li> <li>• Summer precipitation decreases significantly, but 20% more intense rainfall events when they occur</li> </ul> |
| <b>Hot</b>              | <ul style="list-style-type: none"> <li>• Moderate increase in annual temperature (4°F) but no change in summer precipitation</li> <li>• Hottest summer daytime high increases by 4°F; severe drought every 2-3 years with extreme drought conditions lasting up to 4 years</li> <li>• No change to slight increase in spring snowpack b/c of increases in winter and spring precipitation</li> <li>• Growing season increases by ~50 days and "High" fire danger days increase by 10 days</li> <li>• 10% more intense rainfall events</li> </ul>                                                                                      |
| <b>Hot and Very Wet</b> | <ul style="list-style-type: none"> <li>• Least increase in summer daytime high temperature (3°F) but very warm springs (8°F), and large increase in summer precipitation (+15%)</li> <li>• 40% increase in spring precipitation and a high proportion of that falling as rain</li> <li>• Severe drought every 3 years with extreme drought conditions lasting up to 2 years</li> <li>• Growing season increases by ~40 days and "High" fire danger days increase by 1 week</li> <li>• 10% more intense rainfall events</li> </ul>                                                                                                     |

Values and projected changes described above are for the location at **39.7708°N; 105.9069°W** and a mean elevation of **11,521 ft**. Winter is Dec, Jan, Feb; Spring is Mar, Apr, May; Summer is Jun, Jul, Aug and Fall is Sep, Oct, Nov. Dataset: MACA metdata v2 (4-km downscaled climate projections), VIC (v4.1.2) forced by MACAv2-LIVNEH (6-km hydrology projections) and gridMET (4-km historical).
